# Supplementary material for: Portable visual assay for anthrax biomarker based on lanthanide coordination polymer nanoparticles and smartphone-integrated mini-device
Source: Royal Society of Chemistry journal article supplement (doi:10.1039/d3en00707c), 2024-01-01
Supplement: d3en00707c1.pdf [file d3en00707c1.pdf]

## Supporting Information

### **Portable visual assay of anthrax biomarker based on lanthanide coordination polymer nanoparticles and smartphone-integrated mini-device**

Shengnan Yin <sup>a\*</sup>, Tianlun Xu<sup>b</sup>

a, Institute for Advanced Study, Shenzhen University, Shenzhen 518060

b, College of Environmental and Resource Sciences, Zhejiang University, Hangzhou, 310058, China

\*Corresponding Author. E-mail: [snyin0204@163.com](mailto:snyin0204@163.com)

## Table of contents

1. **Figure S1** Particle size measured by DLS.
2. **Figure S2** EDS spectra of LML-Tb<sup>3+</sup>-AMP NPs.
3. **Figure S3** EDS mapping results of LML-Tb<sup>3+</sup>-AMP NPs.
4. **Figure S4** XRD pattern of LML-Tb<sup>3+</sup>-AMP NPs.
5. **Figure S5** Optimization of experimental conditions.
6. **Figure S6** Schematic illustration of the fabrication and composition, and use of the portable detection device.
7. **Figure S7** The RGB values recognized by smartphone APP.
8. **Figure S8** SEM image and UV-vis spectra of LML-Tb<sup>3+</sup>- AMP/AG film.
9. **Table S1** The singlet and triplet energy levels of DPA and the lowest emission level of Tb<sup>3+</sup>.
10. **Table S2** Comparison in the sensitivity performance for DPA detection between the proposed method and the previously reported methods.
11. **Table S3** Determination of DPA in real samples.
12. **Table S4** Comparison in the sensitivity performance for DPA detection between the proposed method and the previously reported smartphone-based sensing method.

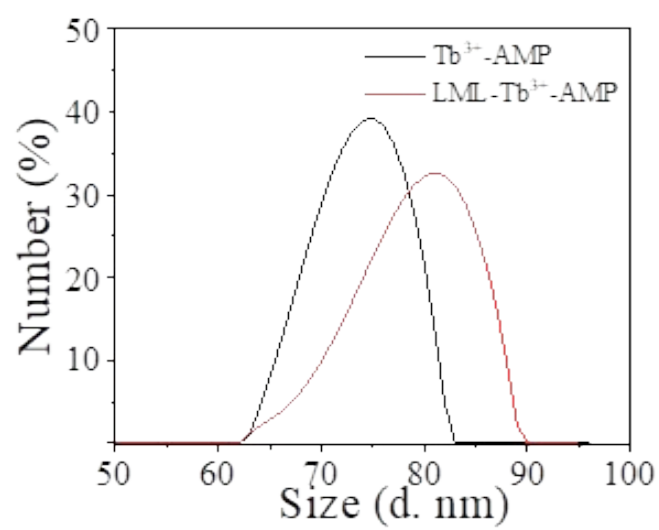

**Figure S1** Particle size measured by DLS

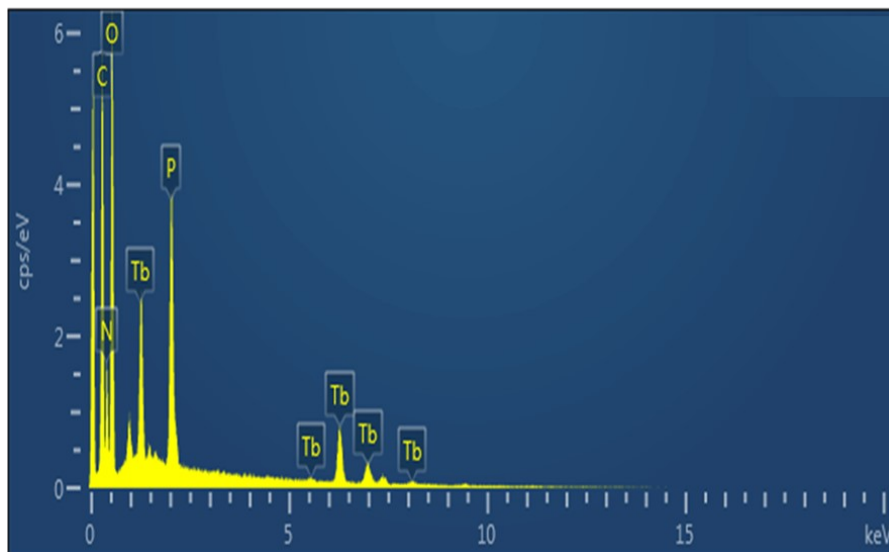

**Figure S2** EDS spectra of LML-Tb<sup>3+</sup>-AMP NPs

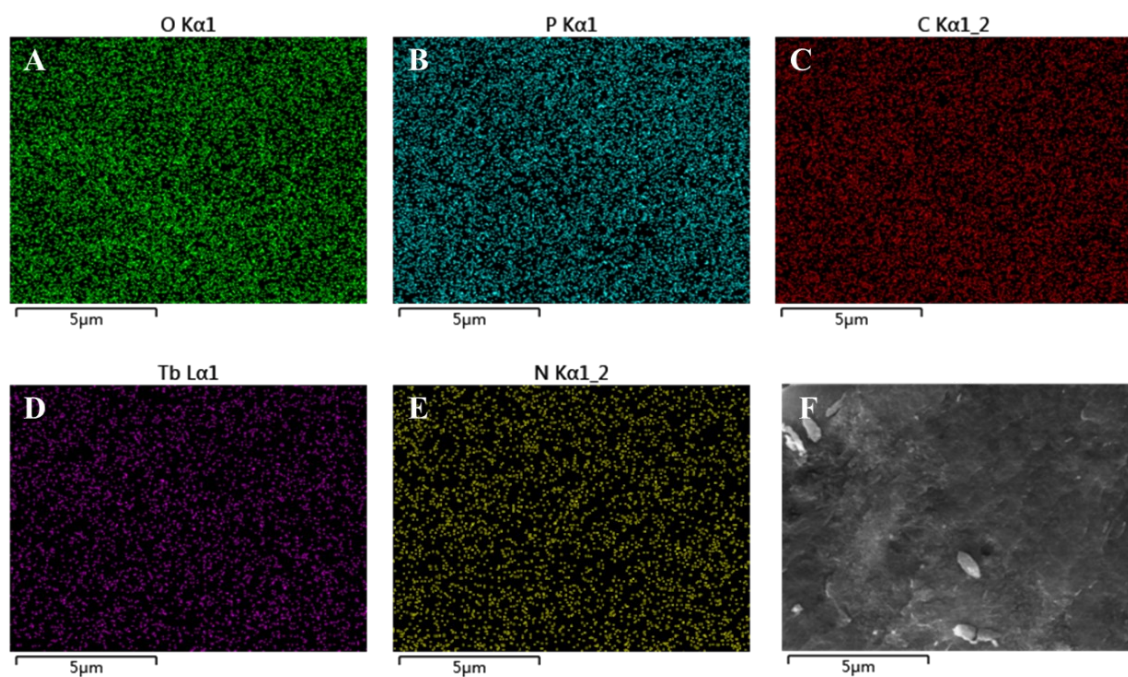

**Figure S3** EDS mapping results of LML-Tb<sup>3+</sup>-AMP NPs. (A) O, (B) P, (C) C, (D) Tb, (E) N, (F) SEM image of LML-Tb<sup>3+</sup>-AMP NPs.

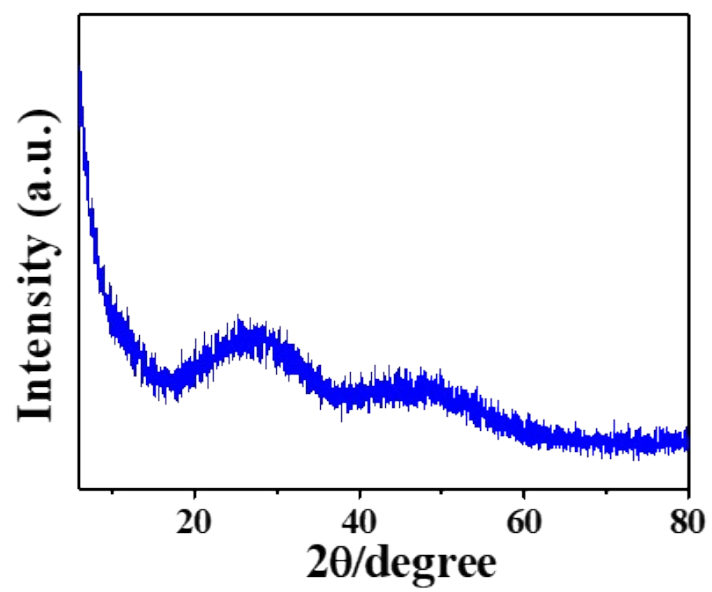

**Figure S4** XRD pattern of LML-Tb<sup>3+</sup>-AMP NPs.

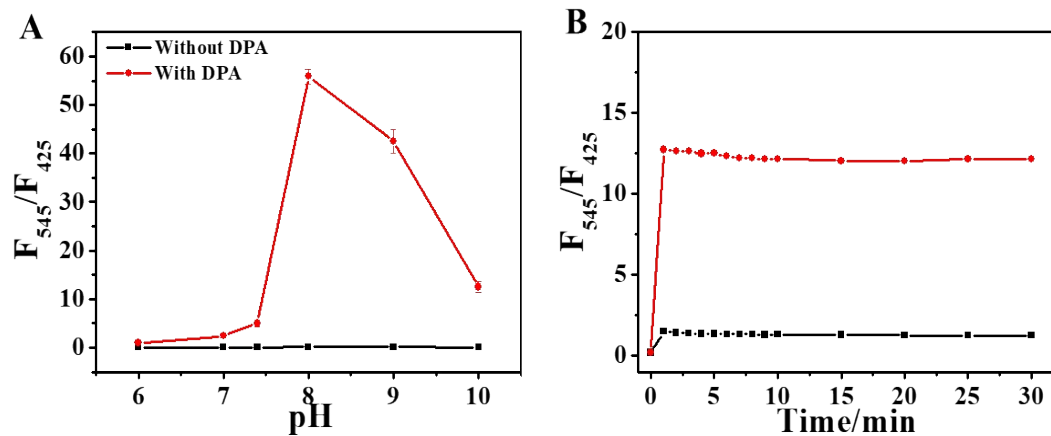

**Figure S5** (A) Effect of pH on the fluorescence ratio ( $F_{545}/F_{425}$ ) of LML-Tb<sup>3+</sup>-AMP in the absence and presence of DPA. (B) Effect of equilibrium time on the fluorescence ratio ( $F_{545}/F_{425}$ ) in the LML-Tb<sup>3+</sup>-AMP system.

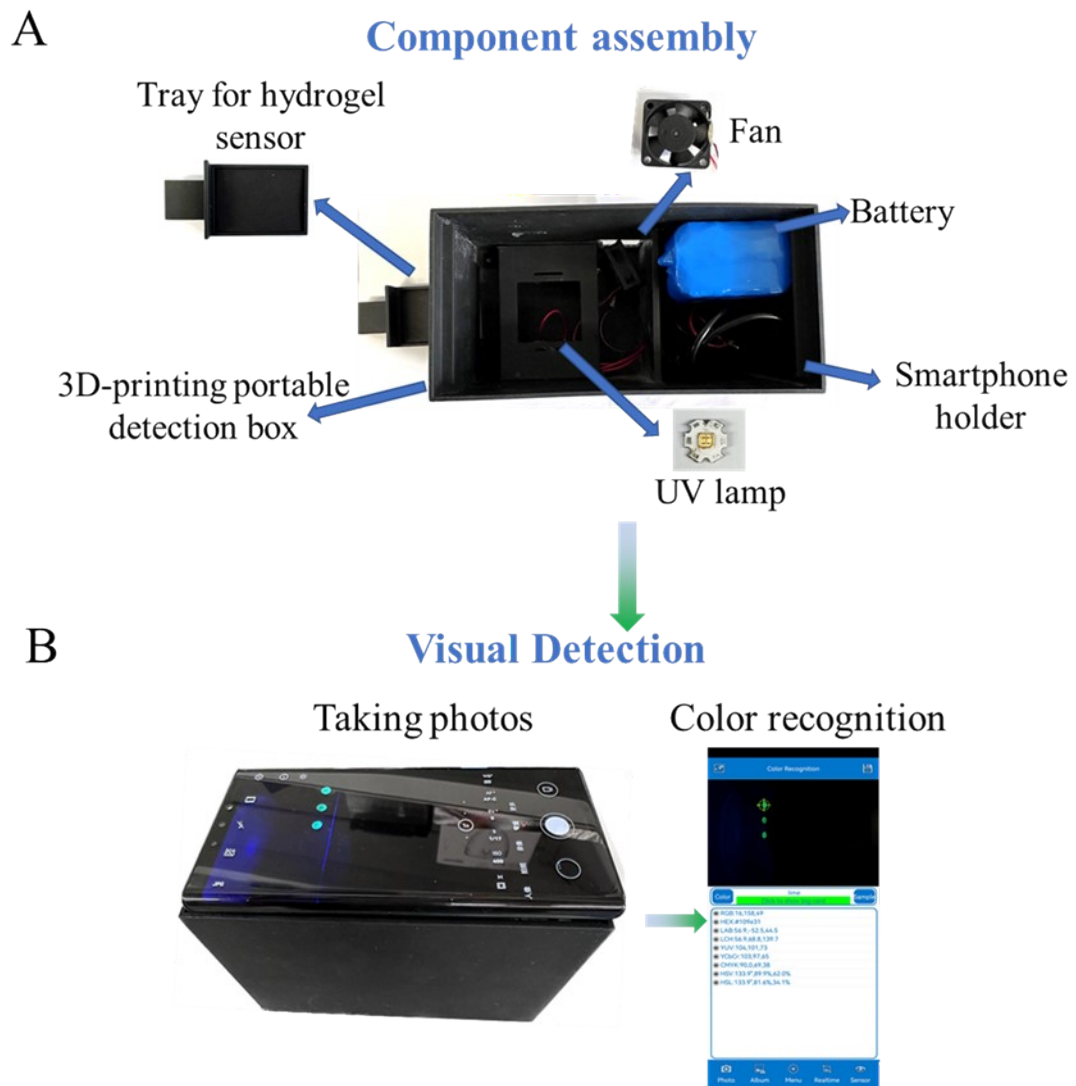

**Figure S6** Schematic illustration of the (A) fabrication and composition, and (B) use of the portable detection device.



A

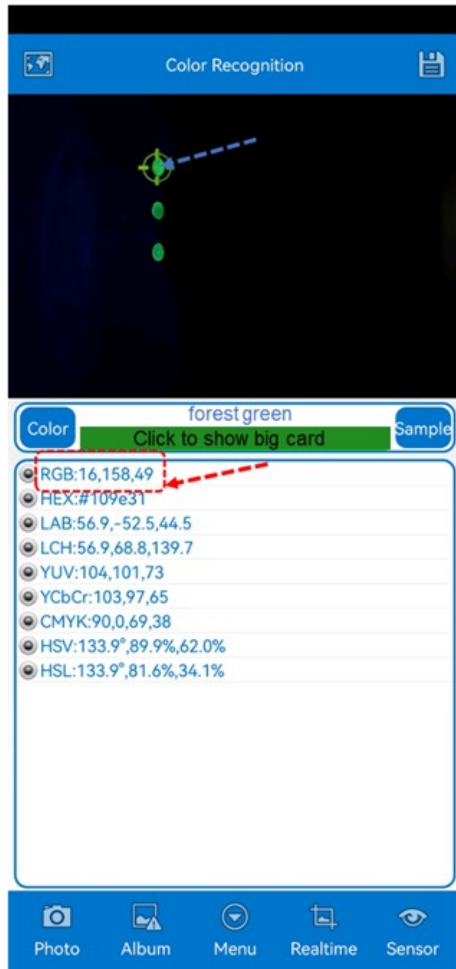

B

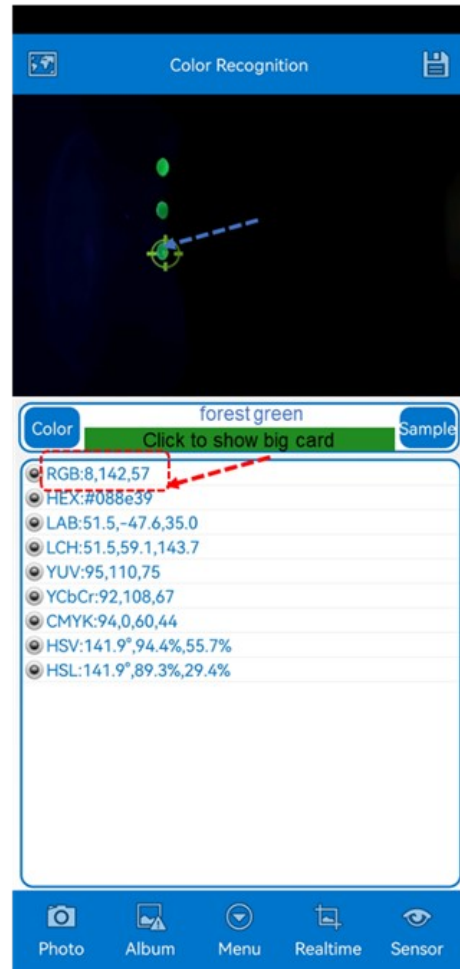

**Figure S7** The RGB values recognized by smartphone APP (A and B) (the photograph was taken under 254 nm UV lamp).

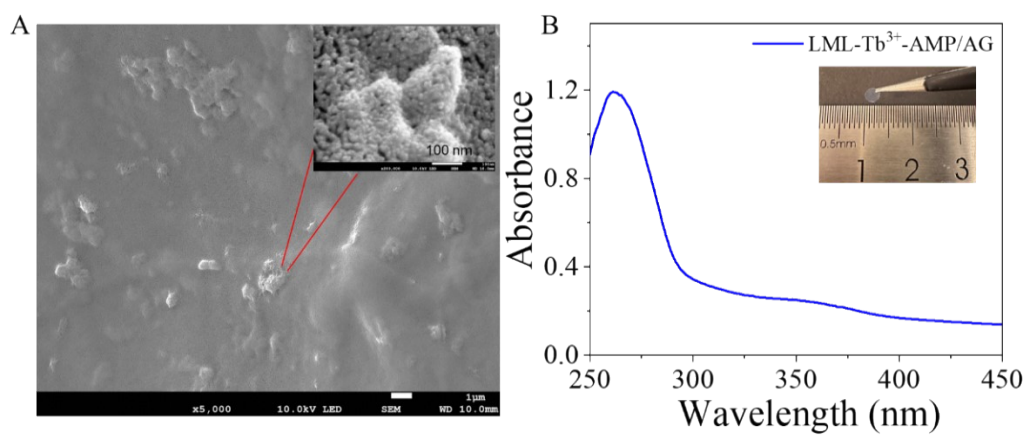

**Figure S8.** (A) SEM image of LML-Tb<sup>3+</sup>-AMP/AG film. (B) UV-vis spectra of LML-Tb<sup>3+</sup>-AMP/AG film. Inset: Image of the hydrogel sensor.

**Table S1** The singlet and triplet energy levels of DPA and the lowest emission level of Tb<sup>3+</sup>.

| Sensitizer | S <sub>1</sub> (cm <sup>-1</sup> ) | T <sub>1</sub> (cm <sup>-1</sup> ) | $\Delta E_{ST}$ (cm <sup>-1</sup> ) | $\Delta E_{TD-Tb}$ (cm <sup>-1</sup> ) | Tb <sup>3+</sup> ( <sup>5</sup> D <sub>4</sub> , cm <sup>-1</sup> ) |
|------------|------------------------------------|------------------------------------|-------------------------------------|----------------------------------------|---------------------------------------------------------------------|
| DPA        | 32722.6                            | 26364.5                            | 6358.1                              | 5864.0                                 | 20500.5                                                             |

The lowest emission levels of Ln<sup>3+</sup> were obtained from ref. [1]

**S<sub>1</sub>**: Lowest excited singlet; **T<sub>1</sub>**: Lowest excited triplet;  $\Delta E_{ST}$ : The energy gap between S<sub>1</sub> and T<sub>1</sub>;  $\Delta E_{TD-Tb}$ : the energy differences between the lowest triplet excited state of sensitizer and the emission levels of Tb<sup>3+</sup>.

**Table S2** Comparison in the sensitivity performance for DPA detection between the proposed method and the previously reported methods.

| Sensing system                                    | Mode        | Linear range<br>( $\mu\text{M}$ ) | LOD<br>(nM) | Ref.      |
|---------------------------------------------------|-------------|-----------------------------------|-------------|-----------|
| $\text{Tb}^{3+}$ -GMP- $\text{Eu}^{3+}$           | Ratiometric | 2-16                              | 96          | [1]       |
| His@ZIF-8/ $\text{Tb}^{3+}$                       | Turn-on     | 0-10                              | 20          | [2]       |
| EBT @ CDs/ $\text{Eu}^{3+}$                       | Ratiometric | 0.5-110                           | 10.6        | [3]       |
| $\text{Tb}^{3+}$ @ UIO-67                         | Ratiometric | 0.3–6                             | 36          | [4]       |
| $\text{Fe}_3\text{O}_4$ @ $\text{Tb}^{3+}$        | Turn-on     | 0–1                               | 5.4         | [5]       |
| R6G/ $\text{Eu}$ -CdS@ZIF-8                       | Ratiometric | 0.1-150                           | 67          | [6]       |
| $\text{Tb}/\text{Eu}$ -BTC                        | Ratiometric | 0.05-3                            | 4.9         | [7]       |
| g- $\text{C}_3\text{N}_4$ - $\text{Eu}^{3+}$ -Cit | Ratiometric | 0.1-15                            | 13          | [8]       |
| LML- $\text{Tb}^{3+}$ -AMP                        | Ratiometric | 0.01–10                           | 3.4         | This work |

**Table S3** Determination of DPA in real samples

| Samples      | Added | Found ( $\mu\text{M}$ ) | Recovery (%) | RSD (%) |
|--------------|-------|-------------------------|--------------|---------|
| Lake water 1 | 0.00  | ND <sup>a</sup>         | —            | —       |
|              | 0.50  | 0.51                    | 110.0        | 2.8     |
|              | 5.00  | 5.12                    | 103.7        | 0.4     |
| Lake water 2 | 0.00  | ND <sup>a</sup>         | —            | —       |
|              | 0.50  | 0.49                    | 97.9         | 1.6     |
|              | 5.00  | 5.01                    | 100.2        | 0.8     |

<sup>a</sup>Not detected.

**Table S4** Comparison in the sensitivity performance for DPA detection between the proposed method and the previously reported smartphone-based sensing method.

| Sensing system                                         | Mode        | Linear range    | LOD          | Ref.      |
|--------------------------------------------------------|-------------|-----------------|--------------|-----------|
| EBT @ CDs/Eu <sup>3+</sup>                             | Ratiometric | 0-12 $\mu$ M    | 0.68 $\mu$ M | [3]       |
| g-C <sub>3</sub> N <sub>4</sub> -Eu <sup>3+</sup> -Cit | Ratiometric | 0-20 $\mu$ M    | 2.5 $\mu$ M  | [8]       |
| Tb-PTA-OH                                              | Ratiometric | 0-40 $\mu$ M    | 0.48 $\mu$ M | [9]       |
| Tb-GSH-CuNCs                                           | Turn-on     | 0.5-70 $\mu$ M  | 0.5 $\mu$ M  | [10]      |
| Tb <sup>3+</sup> @JUC-505                              | Turn-on     | 0-100 $\mu$ M   | 2.17 $\mu$ M | [11]      |
| HAp:Tb-EDTA                                            | Ratiometric | 0.1-500 $\mu$ M | 0.5 $\mu$ M  | [12]      |
| UiO-66-NH <sub>2</sub> /Eu                             | Ratiometric | 0-35 $\mu$ M    | 0.52 $\mu$ M | [13]      |
| Eu-MOF@Tb                                              | Ratiometric | —               | 2 $\mu$ M    | [14]      |
| LML-Tb <sup>3+</sup> -AMP                              | Ratiometric | 0–100 $\mu$ M   | 0.24 $\mu$ M | This work |

## References

- [1] N. Gao, Y. F. Zhang, P. C. Huang, Z. H. Xiang, F. Y. Wu and L. Q. Mao, Perturbing tandem energy transfer in luminescent heterobinuclear lanthanide coordination polymer nanoparticles enables real-time monitoring of release of the anthrax biomarker from bacterial pores, *Anal. Chem.*, 2018, **90**, 7004–7011.
- [2] L. Guo, M. Liang, X. Wang, R. Kong, G. Chen, L. Xia, and F. Qu, The role of l-histidine as molecular tongs: a strategy of grasping Tb<sup>3+</sup> using ZIF-8 to design sensors for monitoring an anthrax biomarker on-the-spot, *Chem. Sci.*, 2020, **11**, 2407-2413.
- [3] Q. Zhou, Y. Fang, J. Li, D. Hong, P. Zhu, S. Chen and K. Tan, A design strategy of dual-ratiometric optical probe based on europium-doped carbon dots for colorimetric and fluorescent visual detection of anthrax biomarker, *Talanta*, 2021, **222**, 121548.
- [4] X. Zhang, W. Zhang, G. Li, Q. Liu, Y. Xu and X. Liu, A ratiometric fluorescent probe for determination of the anthrax biomarker 2,6-pyridinedicarboxylic acid based on a terbium(III)-functionalized UIO-67 metal-organic framework, *Microchim. Acta*, 2020, **187**, 122.
- [5] T. M. Koo, M. J. Ko, B. C. Park, M. S. Kim and Y. K. Kim, Fluorescent detection of dipicolinic acid as a biomarker in bacterial spores employing terbium ion-coordinated magnetite nanoparticles, *J. Hazard. Mater.*, 2021, **408**, 124870.

- [6] X. Q. Li, J. J. Luo, L. Deng, F. H. Ma and M. H. Yang, In situ incorporation of fluorophores in zeolitic imidazolate framework-8 (ZIF-8) for ratio-dependent detecting a biomarker of anthrax spores, *Anal. Chem.*, 2020, **92**, 7114–7122.
- [7] M. Wu, Z. W. Jiang, P. Zhang, X. Gong and Y. Wang, Energy transfer-based ratiometric fluorescence sensing anthrax biomarkers in bimetallic lanthanide metal-organic frameworks, *Sensor Actuat. B-Chem.*, 2023, **383**, 133596.
- [8] M. Yuan, Y. Jin, L. Yu, Y. M. Bu, M. T. Sun, C. Yuan and S. H. Wang. Europium-modified carbon nitride nanosheets for smartphone-based fluorescence sensitive recognition of anthrax biomarker dipicolinic acid, *Food Chem.*, 2023, **398**, 133884.
- [9] L. Yu, L. X. Feng, L. Xiong, S. Li, S. Wang, Z. Y. Wei and Y. X. Xiao, Portable visual assay of *Bacillus anthracis* biomarker based on ligand-functionalized dual-emission lanthanide metal-organic frameworks and smartphone-integrated mini-device, *J. Hazard. Mater.*, 2022, **434**, 128914.
- [10] S. Pu, C. Shi, C. Lv, K. Xu, X. Hou and L. Wu, Tb<sup>3+</sup>-based off-on fluorescent platform for multicolor and dosage-sensitive visualization of bacterial spore marker, *Anal. Chem.*, 2023, **95**, 8137-8144.
- [11] Y. Liu, M. Wang, Y. Hui, L. Sun, Y. Hao, H. Ren, H. Guo and W. Yang, Polyarylether-based COFs coordinated by Tb<sup>3+</sup> for the fluorescent detection of anthrax-biomarker dipicolinic acid, *J. mater. Chem. B*, 2023, DOI: 10.1039/d3tb02070c.



- [12] C. Lv, S. Pu, L. Wu and X. Hou, Self-calibrated HAp:Tb-EDTA paper-based probe with dual emission ratio fluorescence for binary visual and fluorescent detection of anthrax biomarker, *Talanta*, 2024, **266**, 124979.
- [13] P. Huo, Z. Li, R. Yao, Y. Deng, C. Gong, D. Zhang, C. Fan and S. Pu, Dual-ligand lanthanide metal–organic framework for ratiometric fluorescence detection of the anthrax biomarker dipicolinic acid, *Spectrochim Acta A*, 2022, **282**, 121700.
- [14] Y. Xu, X. Shi, F. Ran, Z. Zhang, J. Phipps, X. Liu and H. Zhang, Differential sensitization toward lanthanide metal–organic framework for detection of an anthrax biomarker, *Microchim. Acta*, 2022, **190**, 27.
